# Supplementary material for: Historic photographs of glaciers and glacial landforms from the R. S. Tarr collection at Cornell University
Source: Copernicus journal article supplement (doi:10.5194/essd-2019-44), 2019-06-25
Supplement: Supplementary file 1 [file essd-2019-44-supplement.zip]

## Readme for Supplemental Material

### 1. Table S1.

Metadata for images in the Tarr Collection

Column 1 “SSID”, ID within Shared Shelf system.

Column 2 “ID Number”, Assigned filename within Cornell Archives

Column 3 “Label”, Information written on sleeves of glass plates and negatives or in ledgers accompanying the images. Brackets indicate notes by members of this project.

Column 4 “Region”, Regional location of image.

Column 5 “Subregion”, More precise location of image within region. It was not possible to determine a subregion for every image.

Column 6 “Glacier”, Name of glacier featured in image, if applicable.

Column 7 “Day”, Calendar day image was captured. Not known for all images.

Column 8 “Month”, Month image was captured. Not known for all images.

Column 9 “Year”, Year image was captured. Not known for all images. In some cases, multiple years are associated with one image.

Column 10 “Topographic Map”, USGS or Natural Resources Canada (NRC) topographic map covering area of photo. For USGS maps, both the 1x3 (Alaska) or 1x1 (Lower 48) degree and 15 minute map names are listed. The first name is the 1x3 or 1x1 map and name or number within parenthesis is the 15 minute map, e.g. for Yakutat (D6), the 1x3 map is Yakutat and the 15 minute map is Yakutat D6. The NRC code identifies the 1:250000 scale map appropriate for the image.

Column 11 “Additional Notes”, Additional information about the images, either taken from image sleeves or ledger (plain text) or derived from information gathered during project (*italics*). Letters grades are indications of quality and are taken from exiting notes on sleeves and ledgers.

Column 12 “Media Type”, Format of image housed in Cornell archives.

Column 13 “URL”, Link to scanned image.
